# Supplementary material for: MicroRNA-210 suppresses glucocorticoid receptor expression in response to hypoxia in fetal rat cardiomyocytes
Source: PubMed Central journal article supplement (PMC5655194; doi:10.18632/oncotarget.17801), 2017-05-11
Supplement: oncotarget-08-80249-s001.pdf [file oncotarget-08-80249-s001.pdf]

## MicroRNA-210 suppresses glucocorticoid receptor expression in response to hypoxia in fetal rat cardiomyocytes

### Supplementary Materials

5' –

CCAGAAGAGGACATCAGATCCATTACAGATGGTTGTGAGCCA  
 CCATGTGGTTGCTGGGAATTGAACTCAGGACTTTTGGAAAGTCA  
 GTGCTCTTAACCACTGAGCCATCTCTCCAGCCCCGCAGCTGCT  
 GCATCTTATTGAGTGATTGAGAGCTAAATGCCCTATGTTTTCT  
 CCACAGGAACAACCTGGGGTGATGGAAAGTGTGTAGGGAAGGAG  
 GTCTCTTCTGGCTGCACCTCCATCGCACTGCTTTGGCTCTCCT  
 CCTAGGAGTCCAATAAATGACCTTGGAACTTTGGTCTATTTCT  
 CAAAAGACAGGGGCAAGCCCTTTGAGAGCCCAGCGCTCAACGG  
 GACTCTCCCTCCAAGAATAGATCGCTTACACGGAGTGGAGCGA  
 CAAAGGCAAATCTCACCGTAGAGAAGGGAGTCCCCGAGGCCAA  
 ACCCCTAAGAGCTCCAGGCAAGTCAGAGACAGAACCCCTTCTC  
 ACAGCCAGATGGACACATATCTTTCAGGATCTACAGGGTCTGG  
 HRE1 AGAAAGGCA GAGGCGT ACGTG CCTCCCGAGGGCACGGTGTCC  
 HRE2 TGGCCTTCCAGGCCACCCCTGGGCCATTGCG CAGGAAT ACGTG  
GCCTGGAGAGTTGTGAGTTCCCGAAGAGGAGCAGTTCTTCGAC  
 TGGGTAGGGGAATAACTGACCCGCCTAAACTTCAGTCTGGGAG  
 GCGGGGCTGTTGCTTCTTTCCTCAAAGGGCCTCCCTTGCCCA  
 GCTGTCTCATTGCGCTGCCCCGGTGAAGCATCCCACTATCAGG  
 GACCAGAGC CAACTCAACCCAAATGCAGAAAGCCTGGGCCGTA  
 CCACCGCTCGAGGGAAGGACATGCCTTGGATTGTACCAACGCC  
 CAATCACAGGGAGACACTGTCCAGCGAGGCGCCCTGCAGGCC  
 ☆HRE3 CCGCCCAGCAGTGGCAGCCCCCTCCCG CAAGCCG ACGTG CAGAAA  
 AGAACGCGCCGGGCTCGCCCGCAATGGCTTGTCTCGGCG GCGG  
 Site4 GCGGGGTGT GATGCCTCCCCCTCGTGTTCACTGGGCTGCAG  
 +1

**Supplementary Figure 1: Rat miR-210 promoter sequence.** Three putative HRE sites for HIF-1 $\alpha$ /ARNT dimer binding were identified by bioinformatics search. Binding sites are boxed and core elements in HRE sites are indicated in red. Site 4 is shown in blue. +1 = transcription initiation site (based on RNA-Seq data, NCBI).

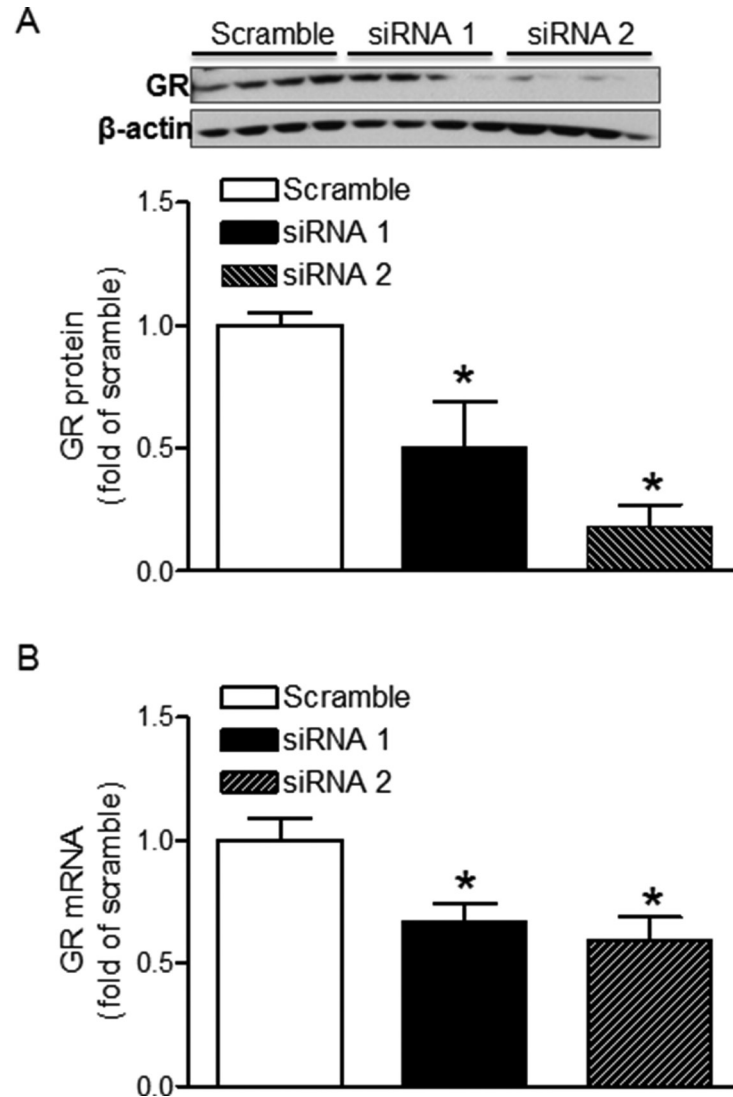

**Supplementary Figure 2: GR knockdown by GR siRNAs.** H9c2 cells were transfected with two GR siRNA oligos for 72 hours. The levels of GR protein (A) and mRNA (B) were determined by Western blot or qPCR. Data are mean  $\pm$  SEM. \* $p < 0.05$ , siRNA vs. scramble;  $n = 4$ .
